# Supplementary material for: A single mutation in rapP induces cheating to prevent cheating in Bacillus subtilis by minimizing public good production
Source: PubMed Central journal article supplement (PMC6123732; doi:10.1038/s42003-018-0136-1), 2018-09-04
Supplement: 42003_2018_136_MOESM1_ESM.pdf [file 42003_2018_136_MOESM1_ESM.pdf]

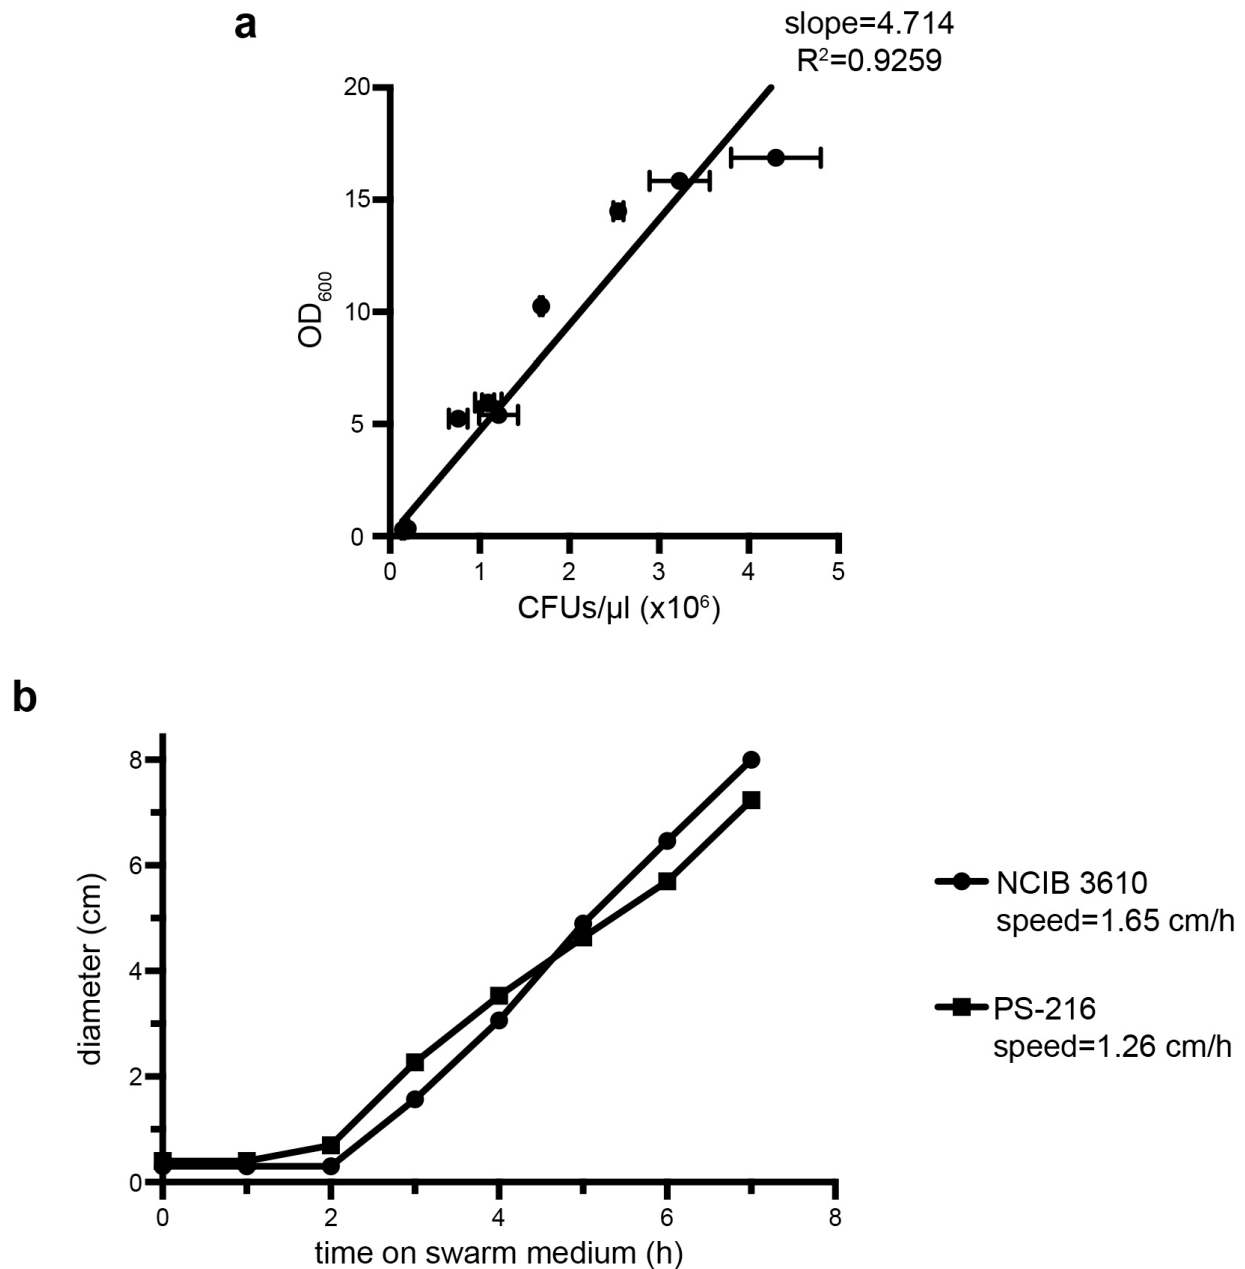

**Supplementary Figure 1, related to Figure 1. Justification of OD<sub>600</sub> measurements as proxy for fitness.**

A) Correlation between OD<sub>600</sub> readings and colony-forming units (CFUs) per µl across a variety of swarm sizes. The slope of the resulting trendline (forced to intercept the origin) as well as the goodness of fit are indicated above the graph.

B) Initial swarm expansion of two strains, with their speeds calculated from the slope of the lines after swarming initiated. Speeds are significantly different by F-test ( $P < 0.0001$ ,  $F = 95.83$ ). Averages of three replicate swarms; error bars are the SEM but smaller than the symbol size in most instances.

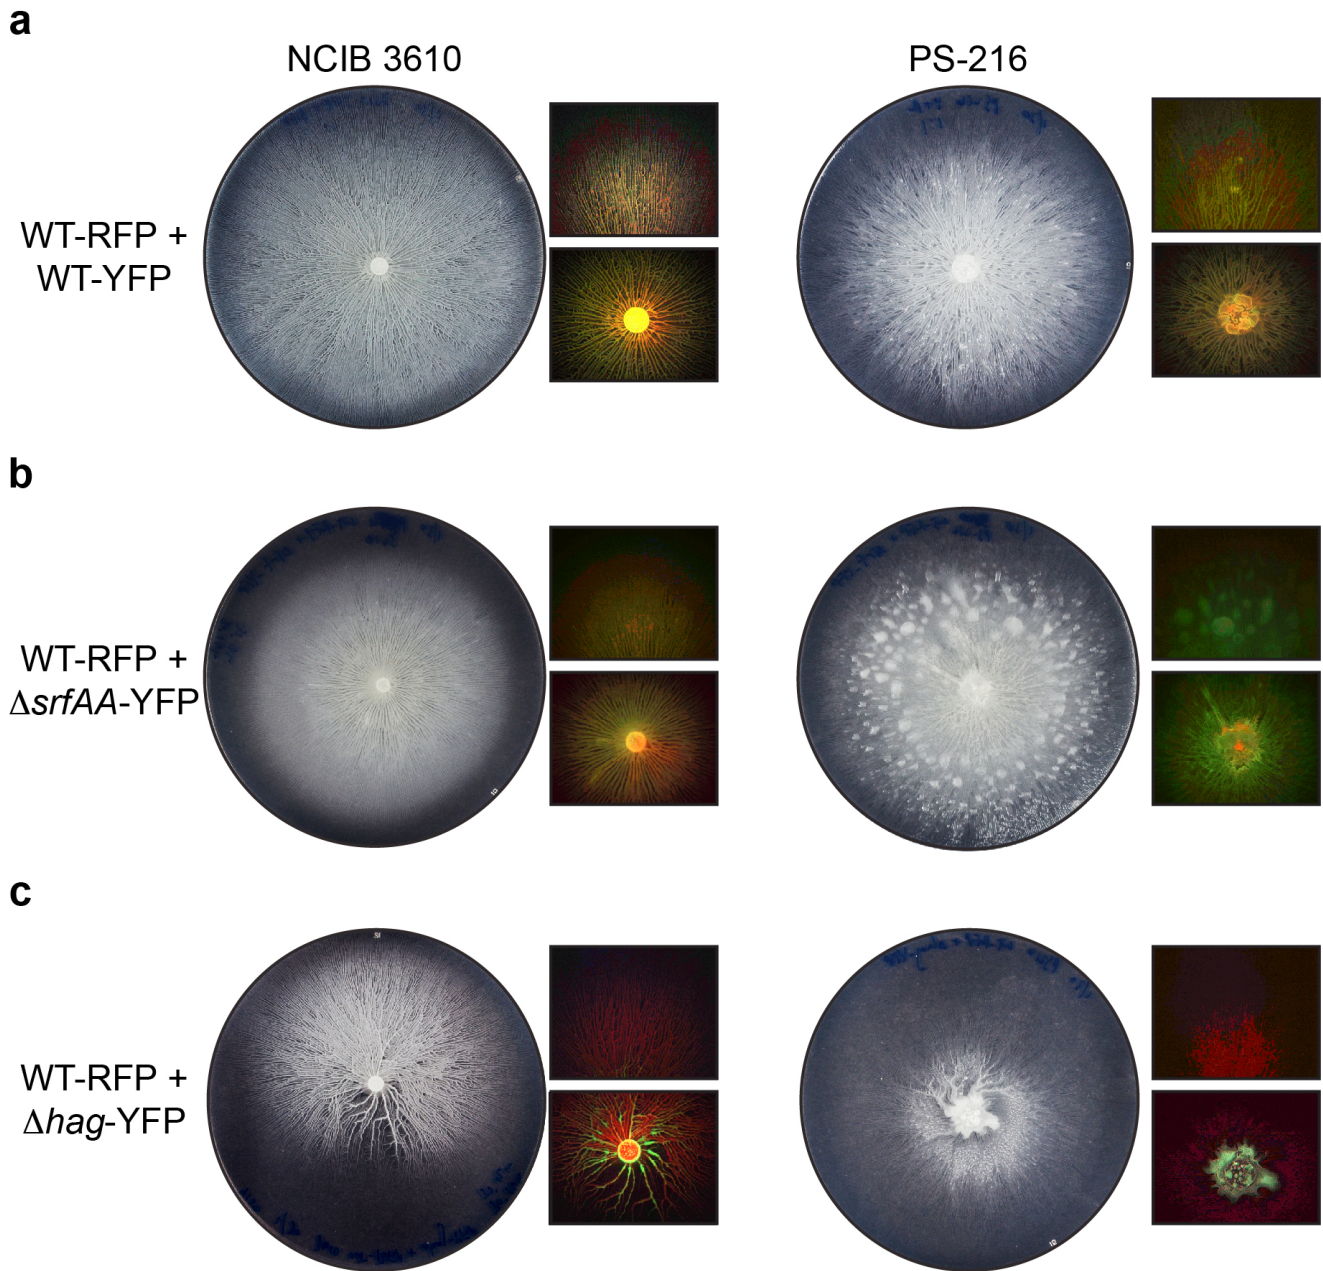

**Supplementary Figure 2, related to Figure 1. Spatial distribution of WT and mutant cells within swarms.**

WT cells constitutively producing RFP were combined in 1:1 ratios with YFP-producing cells (false-colored green) of either WT (A),  $\Delta$ *srfAA* (B), or  $\Delta$ *hag* (C), in both NCIB 3610 and PS-216 strain backgrounds. Magnified areas of the center and top of each plate are shown with merged RFP and YFP fluorescent image captures. Similar results were obtained when fluorescent proteins were swapped (WT-YFP + mutant-RFP).

**a**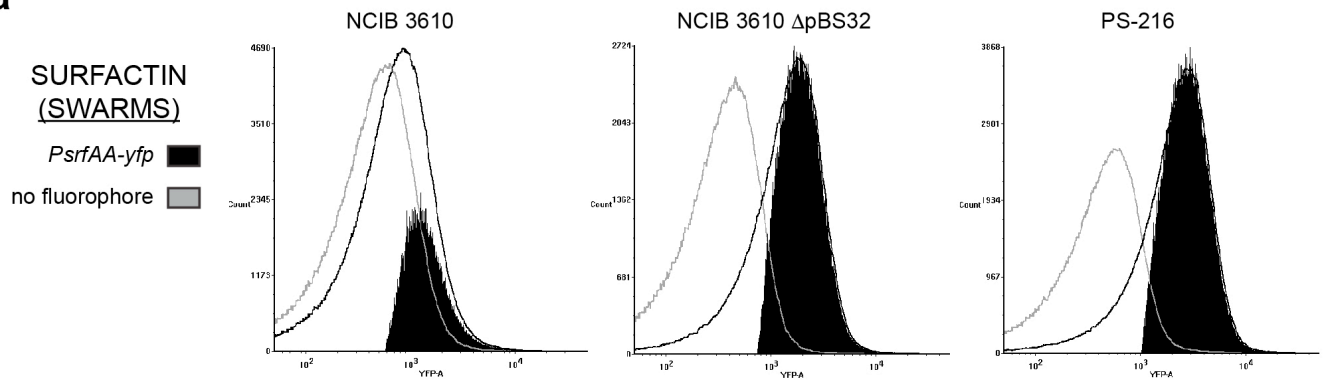**b**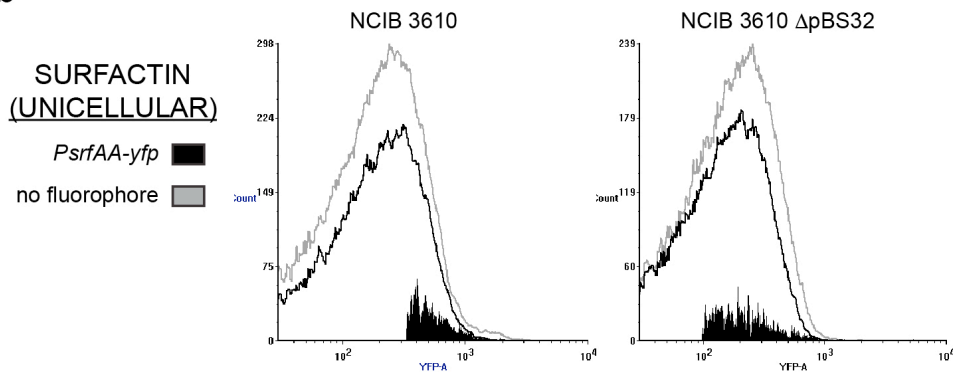**c**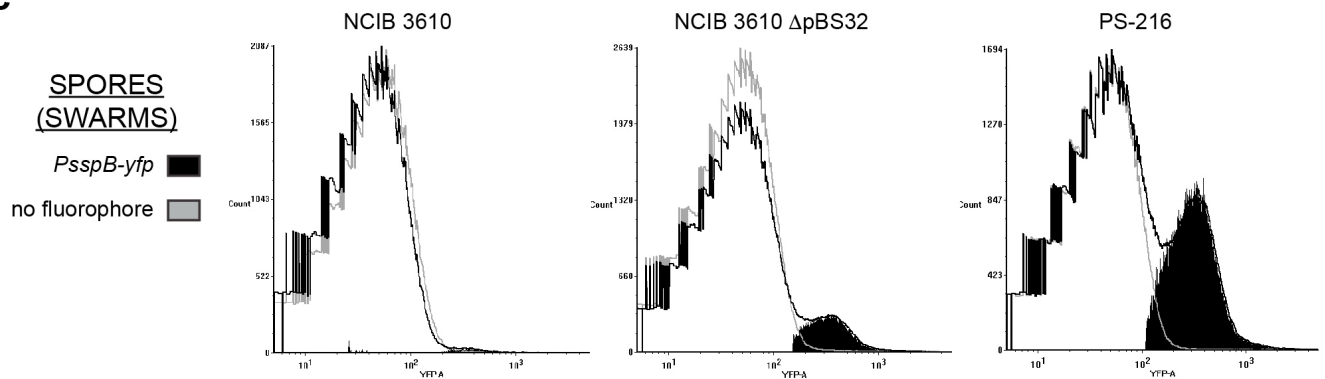**d**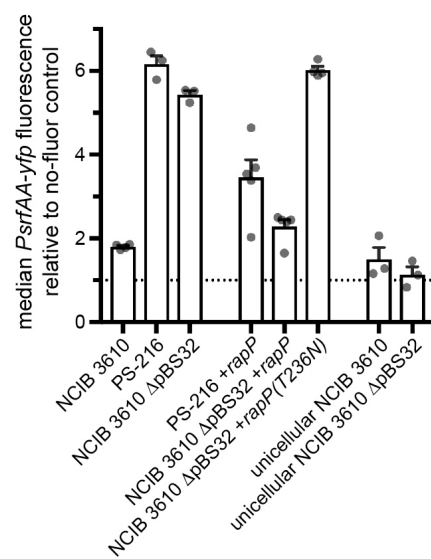

**Supplementary Figure 3, related to Figures 3 and 4. Flow cytometry profiles of transcriptional reporters.**

A–C) Representative histograms of YFP fluorescence detected from cells expressing  $P_{srfAA-yfp}$  in swarms (A) or liquid LB (B), or  $P_{sspB-yfp}$  in swarms (C) in the indicated strain backgrounds. Gray lines are control strains with no fluorescent construct, black lines are the reporter strains, and the filled black areas are what remains of the reporter profile after subtracting out the no-fluorophore histogram to leave only the definitively YFP-positive events.

D) The  $P_{srfAA-yfp}$  flow cytometry data from Figure 3 presented as the median YFP fluorescence levels relative to the median of the no-fluorescence controls (indicated by the dashed line at 1) without any histogram subtraction. Averages of three biological replicates, error bars represent SEM.

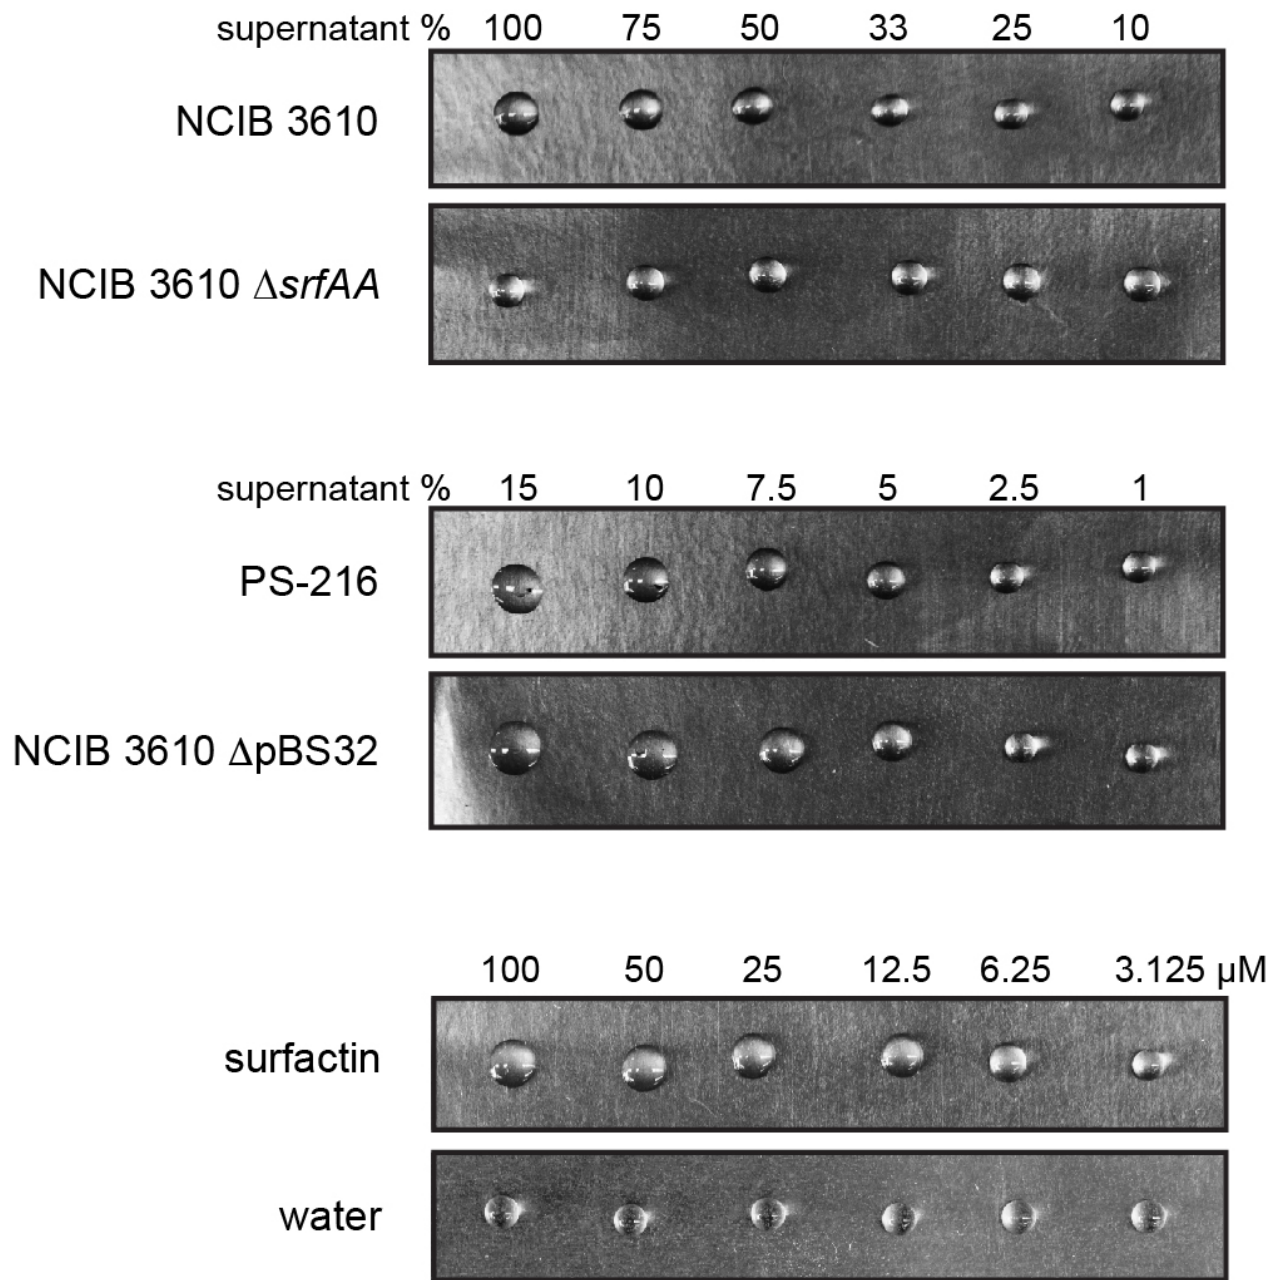

**Supplementary Figure 4, related to Table 1. Droplet collapse assay to measure surfactant concentration.**

Representative images of swarm supernatants that were serially diluted to the indicated percentages and spotted onto parafilm, then photographed after 10 min and compared to known surfactin concentrations. More collapse of the drops (wider diameters) are indicative of higher amounts of surfactant.

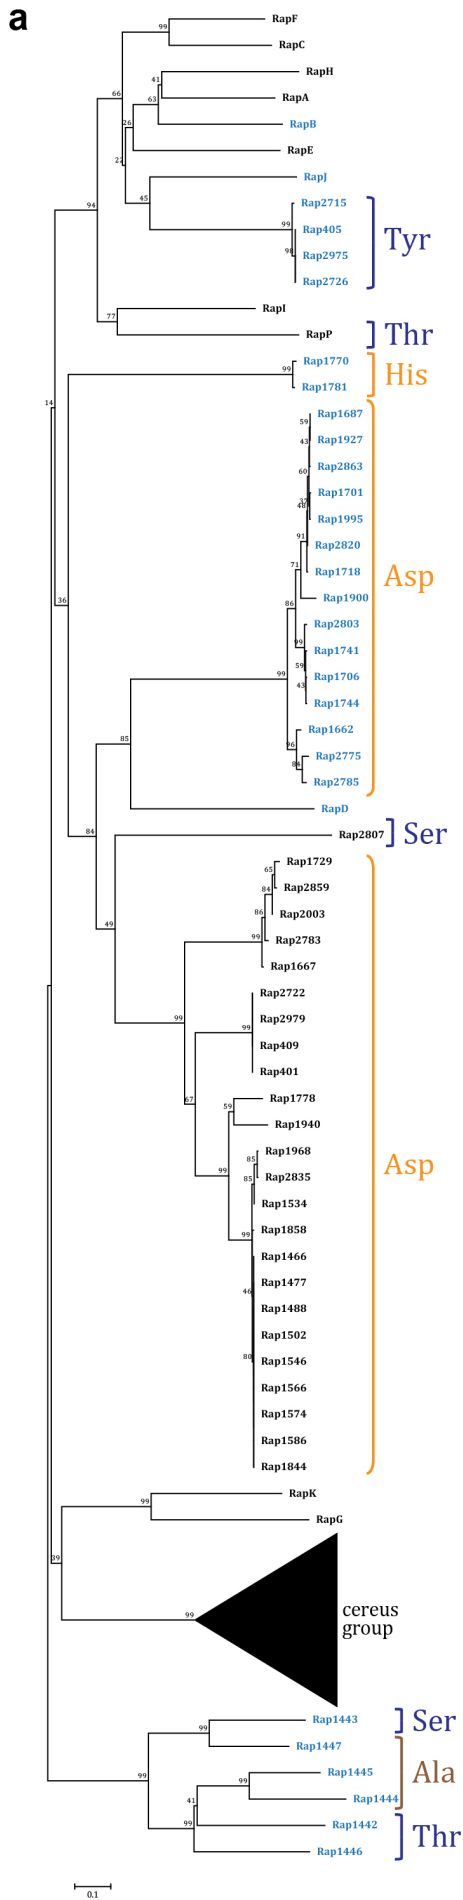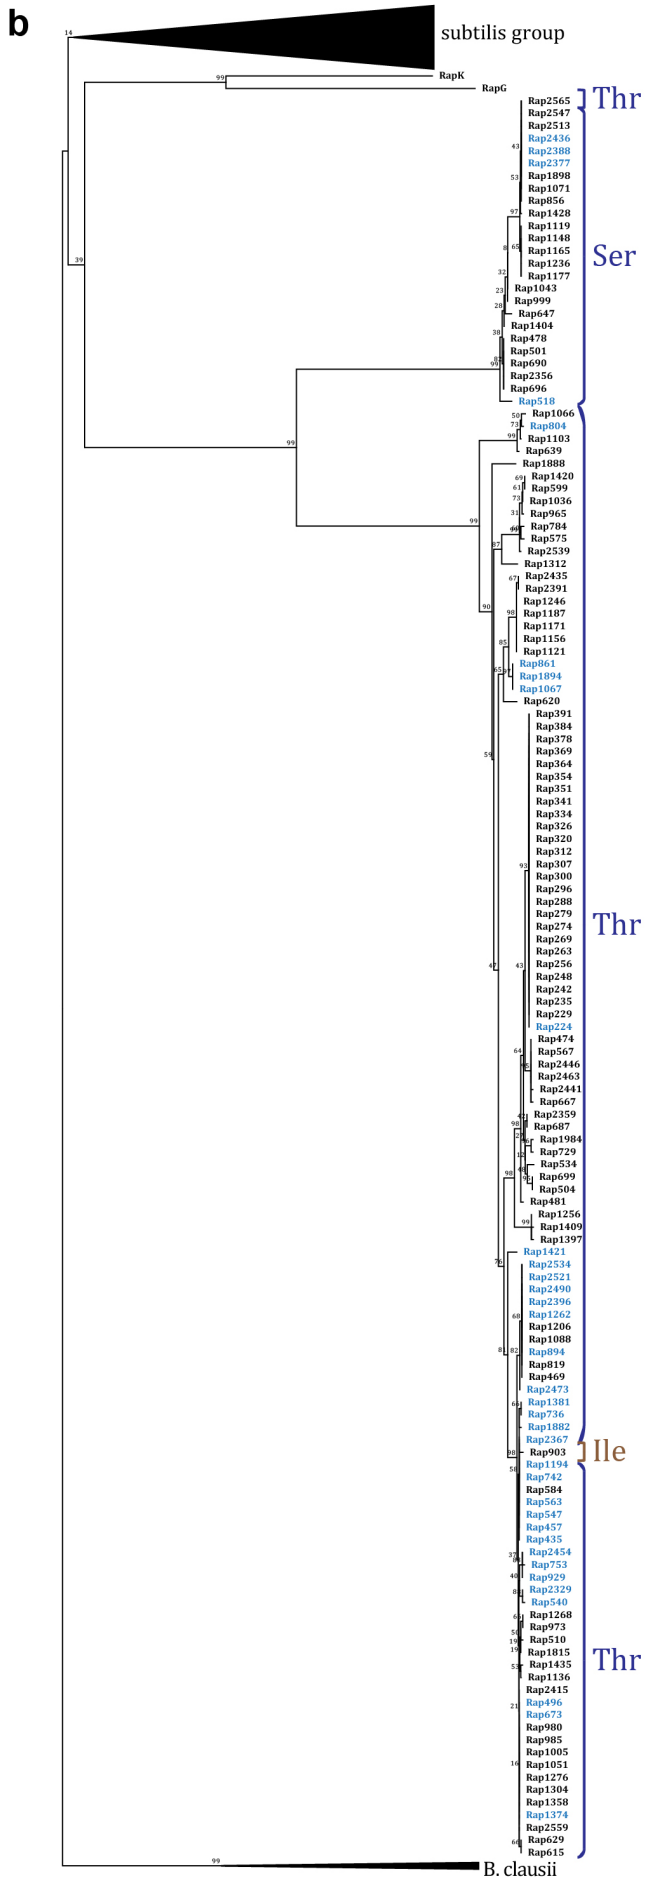

**Supplementary Figure 5, related to Table 3 and Supplementary Data 2. Phylogenetic tree of all Rap homologs with N236 mutated.**

Minimal-evolution tree of all Rap protein sequences with mutations at the equivalent of N236, highlighting either the *subtilis* group and *B. clausii* (A) or the *cereus* group (B); both are from the same tree with different groups compacted for space. The named Raps A-K (with N236 intact) and RapP from *B. subtilis* NCIB 3610 are included for reference. Amino acids listed represent the mutation at position 236, colored by chemical similarity, and orphan Raps with no associated Phr are in blue. Bootstrap values are based on 500 replicates. Based on data from reference 76.

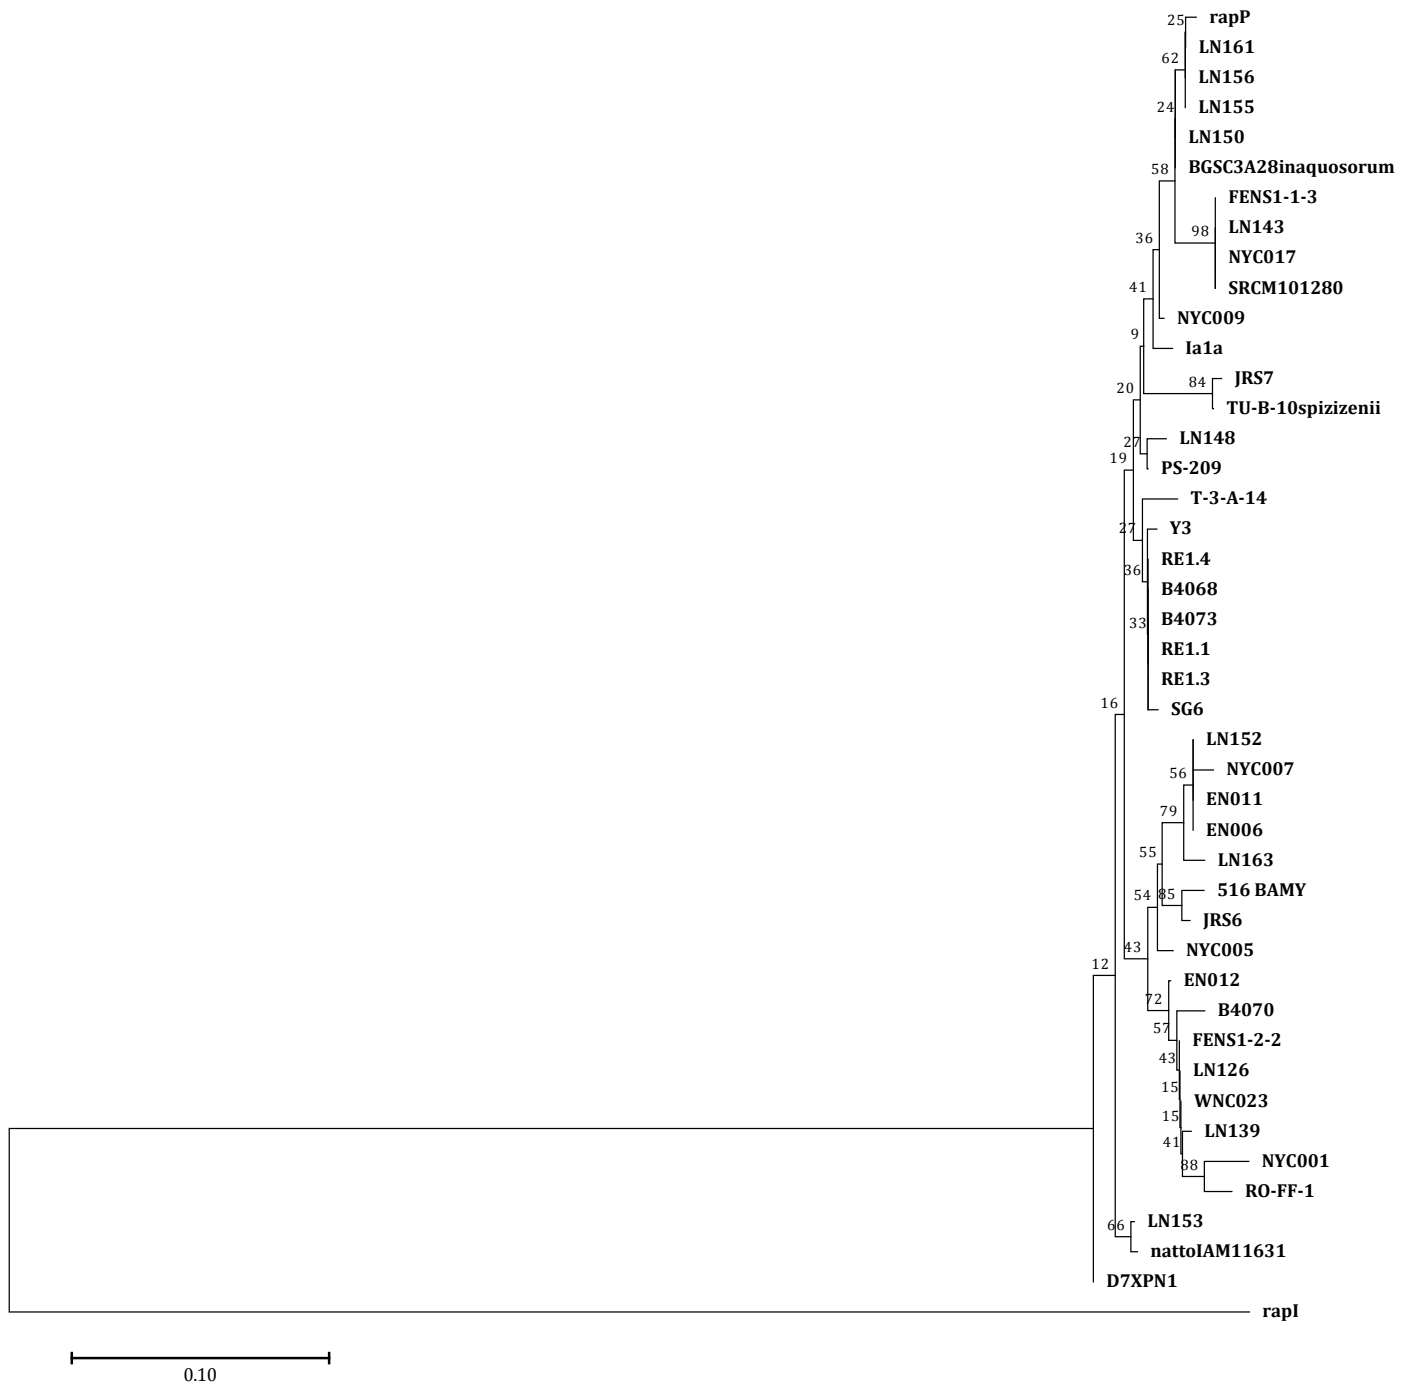

**Supplementary Figure 6, related to Table 2 and Supplementary Data 2. Phylogenetic tree of all RapP homologs.**

Minimal-evolution tree of all RapP nucleotide sequences found by PCR or BLAST. The nearest Rap homolog *rapI* is included for reference to show that the identified homologs cluster with *rapP*. Bootstrap values are based on 500 replicates.



**Supplementary Table 1. Strains used in experiments in this study.**

| <b>Number</b> | <b>Strain background</b> | <b>Genotype</b>                                                               |
|---------------|--------------------------|-------------------------------------------------------------------------------|
| ZK3814        | NCIB 3610                | wild type                                                                     |
| CY49          | NCIB 3610                | amyE::Phyperspank-mKate2:cm                                                   |
| NL712         | NCIB 3610                | amyE::Phyperspank-mKate2:cm, sacA::Pveg-GFP:phleo                             |
| NL069         | NCIB 3610                | srfAA::erm, amyE::Phyperspank-mKate2:cm                                       |
| NL711         | NCIB 3610                | srfAA::erm, amyE::Phyperspank-mKate2:cm, sacA::Pveg-GFP:phleo                 |
| NL104         | NCIB 3610                | rapP::Tn10:spc, amyE::Phyperspank-mKate2:cm                                   |
| NL776         | NCIB 3610                | rapP::Tn10:spc, amyE::Phyperspank-mKate2:cm, sacA::Pveg-GFP:phleo             |
| NL777         | NCIB 3610                | rapP::Tn10:spc, srfAA::erm, amyE::Phyperspank-mKate2:cm                       |
| NL778         | NCIB 3610                | rapP::Tn10:spc, srfAA::erm, amyE::Phyperspank-mKate2:cm, sacA::Pveg-GFP:phleo |
| NL109         | NCIB 3610                | amyE::Phyperclo3-YFP:spc                                                      |
| NL675         | NCIB 3610                | srfAA::erm, amyE::Phyperclo3-YFP:spc                                          |
| NL068         | NCIB 3610                | hag::tet, amyE::Phyperspank-mKate2:cm                                         |
| NL699         | NCIB 3610                | hag::tet, amyE::Phyperclo3-YFP:spc                                            |
| ZK3664        | NCIB 3610                | amyE::PsspB-YFP:spc                                                           |
| ZK3666        | NCIB 3610                | amyE::PtapA-YFP:spc                                                           |
| ZK3776        | NCIB 3610                | amyE::PsrfAA-YFP:spc                                                          |
| HV1056        | NCIB 3610                | amyE::PepsA-YFP:spc                                                           |
| ZK3665        | NCIB 3610                | amyE::Phag-YFP:spc                                                            |
|               |                          |                                                                               |
| NL293         | PS-216                   | wild type                                                                     |
| NL844         | PS-216                   | lacA::rapPphrP:mls                                                            |
| NL294         | PS-216                   | amyE::Phyperspank-mKate2:cm                                                   |
| NL720         | PS-216                   | amyE::Phyperspank-mKate2:cm, sacA::Pveg-GFP:phleo                             |
| NL688         | PS-216                   | srfAA::erm, amyE::Phyperspank-mKate2:cm                                       |
| NL721         | PS-216                   | srfAA::erm, amyE::Phyperspank-mKate2:cm, sacA::Pveg-GFP:phleo                 |
| NL875         | PS-216                   | lacA::rapPphrP:kan, amyE::Phyperspank-mKate2:cm                               |
| NL877         | PS-216                   | lacA::rapPphrP:kan, amyE::Phyperspank-mKate2:cm, sacA::Pveg-                  |

|        |                          |                                                                                   |
|--------|--------------------------|-----------------------------------------------------------------------------------|
|        |                          | GFP:phleo                                                                         |
| NL879  | PS-216                   | srfAA::erm, lacA::rapPphrP:kan, amyE::Phyperspank-mKate2:cm                       |
| NL881  | PS-216                   | srfAA::erm, lacA::rapPphrP:kan, amyE::Phyperspank-mKate2:cm, sacA::Pveg-GFP:phleo |
| NL295  | PS-216                   | amyE::Phyperclo3-YFP:spc                                                          |
| NL687  | PS-216                   | srfAA::erm, amyE::Phyperclo3-YFP:spc                                              |
| NL832  | PS-216                   | hag::tet, amyE::Phyperspank-mKate2:cm                                             |
| NL831  | PS-216                   | hag::tet, amyE::Phyperclo3-YFP:spc                                                |
| NL911  | PS-216                   | amyE::PsrFAA-YFP:spc                                                              |
| NL822  | PS-216                   | amyE::PsspB-YFP:spc                                                               |
| NL791  | PS-216                   | amyE::PepsA-YFP:spc                                                               |
| NL369  | PS-216                   | amyE::PtapA-YFP:spc                                                               |
| NL738  | PS-216                   | amyE::Phag-YFP:spc                                                                |
| NL849  | PS-216                   | lacA::rapPphrP:mls, amyE::PsrFAA-YFP:spc                                          |
| NL852  | PS-216                   | lacA::rapPphrP:mls, amyE::PsspB-YFP:spc                                           |
| NL851  | PS-216                   | lacA::rapPphrP:mls, amyE::PepsA-YFP:spc                                           |
| DS2569 | NCIB 3610 $\Delta$ pBS32 | wild type                                                                         |
| NL872  | NCIB 3610 $\Delta$ pBS32 | lacA::rapPphrP:kan                                                                |
| NL905  | NCIB 3610 $\Delta$ pBS32 | lacA::rapP(T236N)phrP:mls                                                         |
| NL034  | NCIB 3610 $\Delta$ pBS32 | amyE::Phyperspank-mKate2:cm                                                       |
| NL726  | NCIB 3610 $\Delta$ pBS32 | amyE::Phyperspank-mKate2:cm, sacA::Pveg-GFP:phleo                                 |
| NL727  | NCIB 3610 $\Delta$ pBS32 | srfAA::erm, amyE::Phyperspank-mKate2:cm                                           |
| NL736  | NCIB 3610 $\Delta$ pBS32 | srfAA::erm, amyE::Phyperspank-mKate2:cm, sacA::Pveg-GFP:phleo                     |
| NL874  | NCIB 3610 $\Delta$ pBS32 | lacA::rapPphrP:kan, amyE::Phyperspank-mKate2:cm                                   |
| NL876  | NCIB 3610 $\Delta$ pBS32 | lacA::rapPphrP:kan, amyE::Phyperspank-mKate2:cm, sacA::Pveg-GFP:phleo             |
| NL878  | NCIB 3610 $\Delta$ pBS32 | srfAA::erm, lacA::rapPphrP:kan, amyE::Phyperspank-mKate2:cm                       |
| NL880  | NCIB 3610 $\Delta$ pBS32 | srfAA::erm, lacA::rapPphrP:kan, amyE::Phyperspank-mKate2:cm, sacA::Pveg-GFP:phleo |
| NL907  | NCIB 3610 $\Delta$ pBS32 | lacA::rapP(T236N)phrP:kan, amyE::Phyperspank-mKate2:cm                            |

|       |                          |                                                                                          |
|-------|--------------------------|------------------------------------------------------------------------------------------|
| NL914 | NCIB 3610 $\Delta$ pBS32 | lacA::rapP(T236N)phrP:kan, amyE::Phyperspank-mKate2:cm, sacA::Pveg-GFP:phleo             |
| NL922 | NCIB 3610 $\Delta$ pBS32 | srfAA::erm, lacA::rapP(T236N)phrP:kan, amyE::Phyperspank-mKate2:cm                       |
| NL924 | NCIB 3610 $\Delta$ pBS32 | srfAA::erm, lacA::rapP(T236N)phrP:kan, amyE::Phyperspank-mKate2:cm, sacA::Pveg-GFP:phleo |
| NL926 | NCIB 3610 $\Delta$ pBS32 | amyE::PsrfAA-YFP:spc                                                                     |
| NL820 | NCIB 3610 $\Delta$ pBS32 | amyE::PsspB-YFP:spc                                                                      |
| NL788 | NCIB 3610 $\Delta$ pBS32 | amyE::PepsA-YFP:spc                                                                      |
| NL780 | NCIB 3610 $\Delta$ pBS32 | amyE::PtapA-YFP:spc                                                                      |
| NL748 | NCIB 3610 $\Delta$ pBS32 | amyE::Phag-YFP:spc                                                                       |
| NL845 | NCIB 3610 $\Delta$ pBS32 | lacA::rapPphrP:mls, amyE::PsrfAA-YFP:spc                                                 |
| NL848 | NCIB 3610 $\Delta$ pBS32 | lacA::rapPphrP:mls, amyE::PsspB-YFP:spc                                                  |
| NL847 | NCIB 3610 $\Delta$ pBS32 | lacA::rapPphrP:mls, amyE::PepsA-YFP:spc                                                  |
| NL916 | NCIB 3610 $\Delta$ pBS32 | lacA::rapP(T236N)phrP:mls, amyE::PsspB-YFP:spc                                           |
| NL909 | NCIB 3610 $\Delta$ pBS32 | lacA::rapP(T236N)phrP:mls, amyE::PsrfAA-YFP:spc                                          |
| NL918 | NCIB 3610 $\Delta$ pBS32 | lacA::rapP(T236N)phrP:mls, amyE::PepsA-YFP:spc                                           |
